# Supplementary material for: Twin boundary CdxZn1−xS: a new anode for high reversibility and stability lithium/sodium-ion batteries
Source: Royal Society of Chemistry journal article supplement (doi:10.1039/d2ta06090f), 2022-01-01
Supplement: d2ta06090f1.pdf [file d2ta06090f1.pdf]

## Supporting Information

### **Twin Boundary $\text{Cd}_x\text{Zn}_{1-x}\text{S}$ : A New Anode for High Reversibility and Stability**

#### **Lithium/Sodium-Ion Batteries**

Zhen Kong<sup>a,b,†</sup>, Meiling Huang<sup>a,b,†</sup>, Kang Zhang<sup>b</sup>, Zhenyan Liang<sup>b</sup>, Huayao Tu<sup>b</sup>, Yongliang Shao<sup>a,b</sup>, Yongzhong Wu<sup>a,b,\*</sup>, Xiaopeng Hao<sup>a,b,\*</sup>

a. School of Materials Science and Engineering, Qilu University of Technology (Shandong Academy of Science), Jinan, 250353, P. R. China;

b. State Key Lab of Crystal Materials, Shandong University, Jinan 250100, P. R. China.

† These authors contributed equally to this work.

\*Corresponding author: E-mail: wuyz@sdu.edu.cn; xphao@sdu.edu.cn

#### **This file includes:**

##### **S1. Materials**

##### **S2. Experimental Section**

##### **S3. Material Characterizations**

##### **S4. Electrochemical Measurements**

##### **S5. DFT calculations**

##### **S6. Supplementary Figures S1-S20**

## S1. Materials

Zinc acetate dihydrate ( $C_4H_6O_4Zn \cdot 2H_2O$ ), thioacetamide ( $C_2H_5NS$ , TAA), ethanediamine ( $C_2H_8N_2$ , EDA), and sodium sulfide ( $Na_2S \cdot 9H_2O$ ) were purchased from Sinopharm Chemical Reagent Co., Ltd., China. Cadmium acetate dihydrate ( $C_4H_6O_4Cd \cdot 2H_2O$ ) was purchased from Aladdin Reagent Co., Ltd. All the reagents were used as received.

## S2. Experimental Section

**Synthesis of twin  $Cd_xZn_{1-x}S-B$ :** As a typical example,  $Cd_{0.7}Zn_{0.3}S-B$  was prepared by sequentially adding 7.0 mmol of  $C_4H_6O_4Cd \cdot 2H_2O$ , 3.0 mmol  $C_4H_6O_4Zn \cdot 2H_2O$  and 12.5 mmol of TAA to a 30 ml aqueous solution containing 5 mL of EDA. After stirring for 30 min, the mixture was sealed in a 50 mL teflon-lined autoclave, and heated to 180 °C for 24 h. After cooling down, the product was separated by filtration, and dried at 80 °C for 12 h in a vacuum oven. Similarly, the other twin  $Cd_xZn_{1-x}S-B$  series samples could be obtained by adjusting the ratio of the precursors, specifically,  $C_4H_6O_4Cd \cdot 2H_2O$  was adjusted to 1.0, 3.0, 5.0 and 9.0 mmol, respectively, and the corresponding  $C_4H_6O_4Zn \cdot 2H_2O$  was adjusted to 9.0, 7.0, 5.0 and 1.0 mmol. The obtained samples were named  $Cd_{0.1}Zn_{0.9}S-B$ ,  $Cd_{0.3}Zn_{0.7}S-B$ ,  $Cd_{0.5}Zn_{0.5}S-B$ , and  $Cd_{0.9}Zn_{0.1}S-B$ , respectively.

As a comparison,  $Cd_{0.7}Zn_{0.3}S$  sample without twin boundary was prepared by changing the sulfur source to  $Na_2S$  and EDA was not added, and other conditions remained unchanged as the above preparation experiment. The preparation conditions of ZnS and CdS were the same as that of  $Cd_{0.7}Zn_{0.3}S-B$ , except that only Cd source and Zn source were added, respectively.

## S3. Material Characterizations

X-ray diffraction (XRD) measurement was carried out on a Bruker D8-Advance X-ray powder diffractometer with a Cu-K $\alpha$  radiation ( $\lambda=0.15418$  nm). Scanning electron microscopy (SEM) images were collected using a Hitachi S-4800 microscope equipped with an energy dispersive X-ray analyzer (EDS, Horiba EMAX Energy EX-350). UV-vis diffuse reflectance spectroscopy (DRS) was conducted using a Shimadzu UV2550 recording spectrophotometer

equipped with an integrating sphere with wavelength of 200 nm to 900 nm. BaSO<sub>4</sub> was used as a reference. TEM and HRTEM images were obtained with a Philips Tecnai 20U-Twin microscope at an acceleration voltage of 200 kV. X-ray photoelectron spectroscopy (XPS, Thermo ESCALAB 250) was performed using monochromated Al-K $\alpha$  radiation (1486.8 eV). High angle annular dark field images (HAADF AC-TEM) and EDX surface scans were taken by an FEI Titan with dual spherical aberration correctors and the microscope was operated at 300 kV.

#### **S4. Electrochemical Measurements**

The electrodes were fabricated by mixing 80% the active materials, 10% acetylene black, and 10% polyvinylidene difluoride (PVDF) dissolved in N-methyl-2-pyrrolidone (NMP). The mixed slurry uniformly pasted on copper foil and dried at 110 °C under vacuum for 10 h. The accurate mass loadings of the active materials were controlled in the range of 0.8-1.2 mg cm<sup>-2</sup>.

For LIBs, 1 M LiPF<sub>6</sub> in EC: DMC: EMC (1:1:1, wt%) with 2.0% FEC was utilized as electrolyte. 2032-type coin cells were then assembled in a glove box filled with Ar (oxygen and moisture less than 1 ppm) using polypropylene film (Celgard 2320) as the separator. For the half-cell, pure Li metal was used as the counter electrode. The coin-type full battery was assembled using commercial LiFePO<sub>4</sub> as the cathode, and 1 M LiPF<sub>6</sub> in EC: DMC: EMC (1:1:1, wt%) with 2.0% FEC used as the electrolyte. The cathode electrode was prepared by mixing LiFePO<sub>4</sub>, acetylene black, and polyvinylidene fluoride (PVDF) in a weight ratio of 8:1:1, followed by coating on aluminum foil. Prior to full-cell fabrication, the Cd<sub>0.7</sub>Zn<sub>0.3</sub>S-B anode was electrochemically activated by prelithiation, which was implemented by cycling it against a Li foil to eliminate the initial irreversible capacity. We take the reversible capacity of Cd<sub>0.7</sub>Zn<sub>0.3</sub>S-B in the first cycle (594.7 mA h g<sup>-1</sup>) and the capacity of LiFePO<sub>4</sub> after stable cycle (84.0 mA h g<sup>-1</sup>) as reference, the value for N/P=1.15, which described as equation of (S-1). The mass loading for the cathode was determined to about 2.58 mg cm<sup>-2</sup> and the anode was about

0.42 mg cm<sup>-2</sup>. The full-cells of Cd<sub>0.7</sub>Zn<sub>0.3</sub>S-B||LiFePO<sub>4</sub> were tested between 2.5 and 4.0 V (vs Li<sup>+</sup>/Li) at room temperature. The capacity is calculated based on the mass of the Cd<sub>0.7</sub>Zn<sub>0.3</sub>S-B.

$$\frac{N}{P} = \frac{\text{capacity contributed by anode}}{\text{capacity contributed by cathode}} = \frac{\text{reversible specific capacity of anode}}{\text{reversible specific capacity of cathode}}$$

$$= \frac{594.7 \text{ mA h g}^{-1} * 0.42 \text{ mg cm}^{-2}}{84.0 \text{ mA h g}^{-1} * 2.58 \text{ mg cm}^{-2}}$$

$$= 1.15 \quad (S-1)$$

For the SIBs, Na metal is the counter and reference electrode in the half cells. The glass microfibers of Whatman GF/D acted as the separator and NaClO<sub>4</sub> (1.0 M) in ethylene carbonate (EC) and diethyl carbonate (DEC) (volume ratio of 1:1) with 5.0 wt % Fluoroethylene Carbonate (FEC) adding acted as electrolyte. The coin-type full battery was assembled using the as-obtained NaNi<sub>0.45</sub>Cu<sub>0.05</sub>Mn<sub>0.4</sub>Ti<sub>0.1</sub> (NaNCMT) as the cathode, and the Cd<sub>0.7</sub>Zn<sub>0.3</sub>S-B anode was electrochemically activated by presodiation. The full-cells of Cd<sub>0.7</sub>Zn<sub>0.3</sub>S-B||NaNCMT were tested between 2.0 and 4.0 V (vs Na<sup>+</sup>/Na) at room temperature. The capacity is calculated based on the anode mass.

The charge-discharge tests were performed on a NEWARE battery measurement system between cut off voltages of 3 V and 0.01 V. The obtained specific capacities were calculated based on the total mass of the active materials. Cyclic voltammetry (CV) tests were carried out between 0.01 V and 3 V at different scan rates from 0.1 to 1.0 mV s<sup>-1</sup> on a CHI760D electrochemical working station. Electrochemical impedance spectroscopy (EIS) patterns were recorded using a CHI760D electrochemical working station in the frequency range from 100 kHz to 0.01 Hz with amplitude of 5 mV.

## S5. DFT calculations

All calculations were performed using the plane wave based periodic DFT method as implemented in the Vienna Ab Initio Simulation Package (VASP). The electron-ion interaction was described with the projector augmented wave (PAW) method. The electron exchange and correlation energies were treated within the generalized gradient approximation in the Perdew-Burke-Ernzerhof functional (GGA-PBE). The plane wave basis was set up to 500 eV. Computations were satisfied until the energy and force converged within  $10^{-6}$  eV and  $0.01$  eV  $\text{\AA}^{-1}$ , respectively.

The climb image nudged elastic band (CI-NEB) method with the limited-memory Broyden-Fletcher-Goldfarb-Shanno (LBFGS) optimizer was used to search the paths for the diffusion of  $\text{Li}^+$  ions. The initial (reactant) and final (product) configurations were obtained from fully converged relaxation. Five of inserted images used in the CI-NEB calculations depended on the reaction coordinates between the reactant and product.

## S6. Supplementary Figures S1-S20

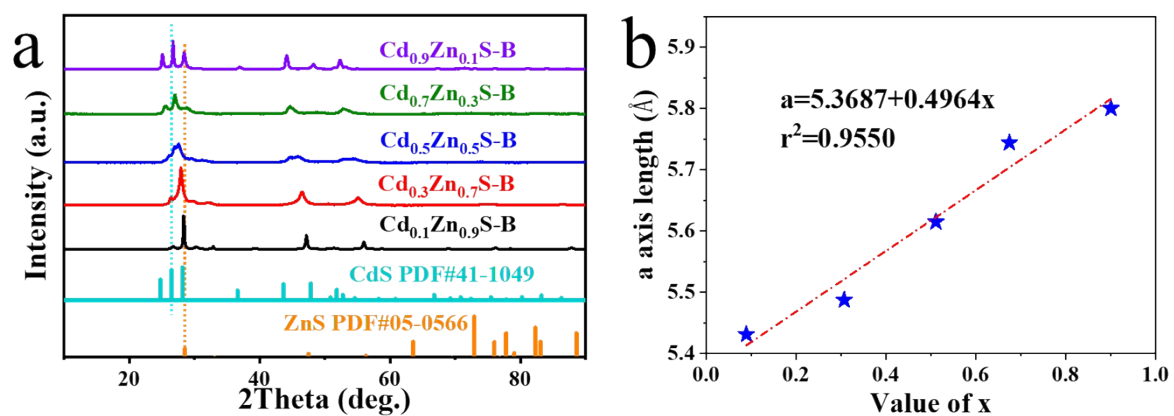

**Fig. S1.** (a) XRD patterns of  $\text{Cd}_x\text{Zn}_{1-x}\text{S-B}$  series samples, CdS and ZnS. (b) The fitted line of lattice constants obtained from XRD patterns according to Vegard's law.

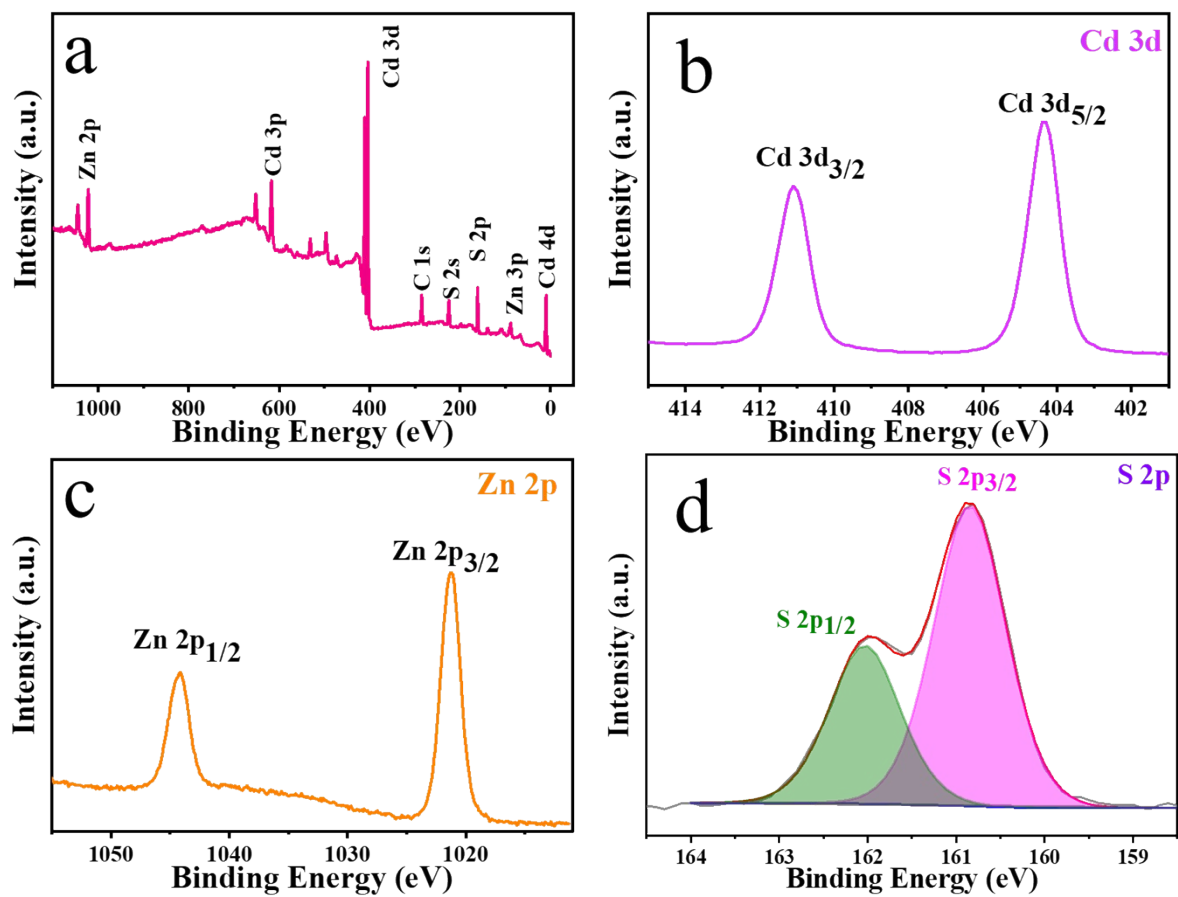

**Fig. S2.** (a) XPS survey of  $\text{Cd}_{0.7}\text{Zn}_{0.3}\text{S-B}$ . High-resolution XPS spectra of (b) Cd 3d, (c) Zn 2p and (d) S 2p for  $\text{Cd}_{0.7}\text{Zn}_{0.3}\text{S-B}$ .

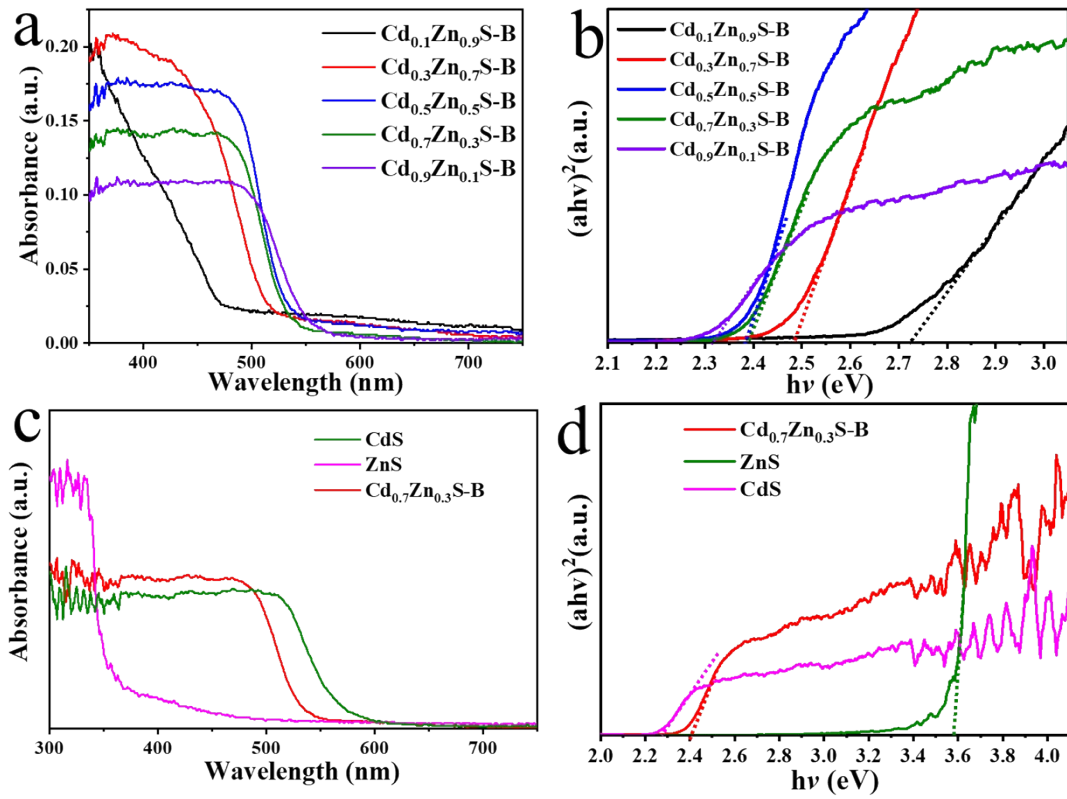

**Fig. S3.** UV-vis diffuse reflectance spectra and corresponding plots of transformed Kubelka-Munk function versus photon energy for (a, b) Cd<sub>x</sub>Zn<sub>1-x</sub>S-B and (c, d) Cd<sub>0.7</sub>Zn<sub>0.3</sub>S-B, ZnS, and CdS.



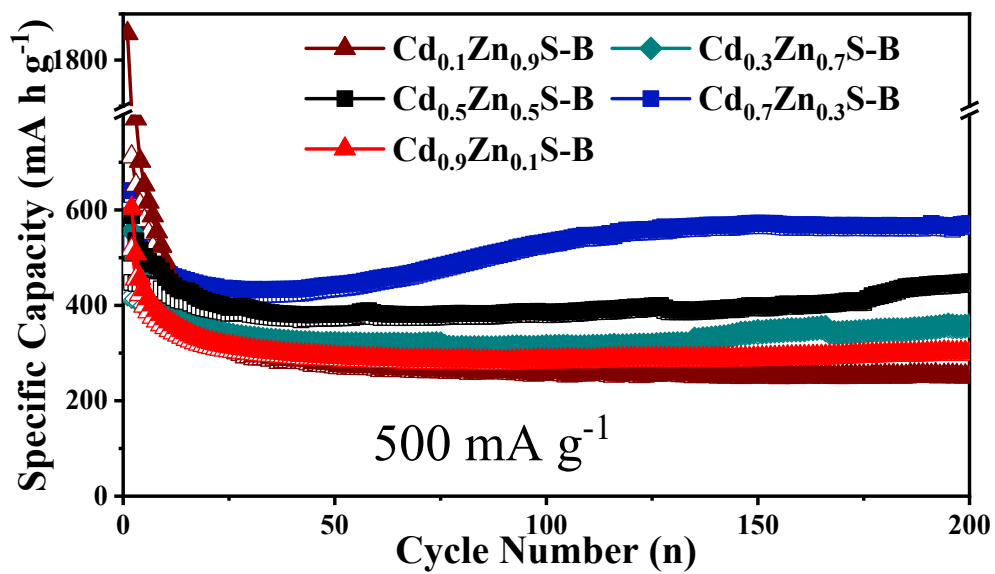

Fig. S4. Cycling performance at  $500 \text{ mA g}^{-1}$  for  $\text{Cd}_x\text{Zn}_{1-x}\text{S-B}$  series samples.

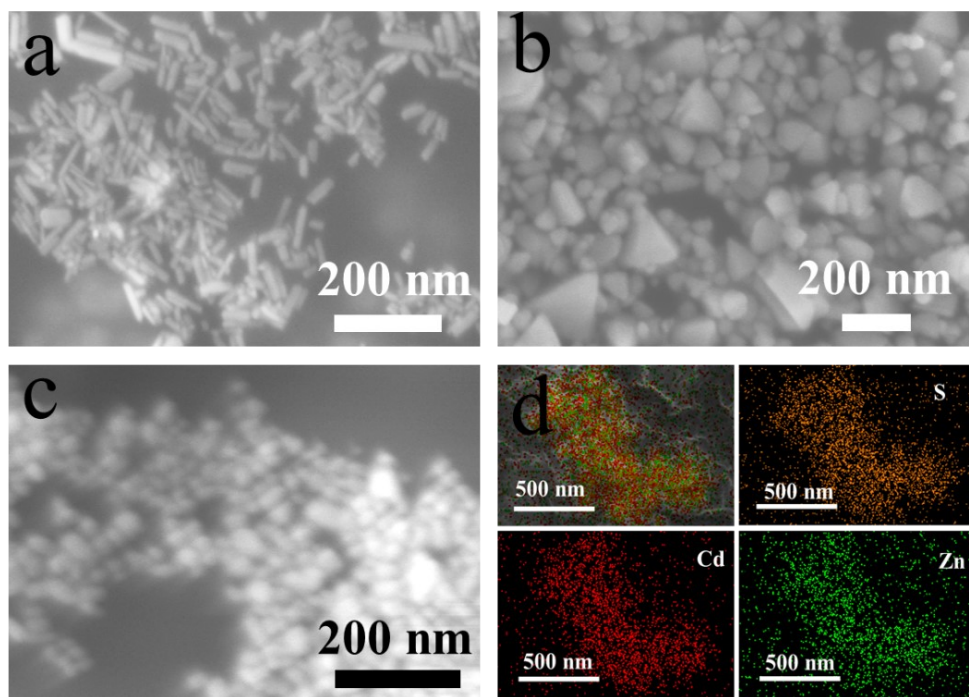

**Fig. S5.** SEM images of (a) ZnS, (b) CdS, and (c) Cd<sub>0.7</sub>Zn<sub>0.3</sub>S. (d) SEM image of Cd<sub>0.7</sub>Zn<sub>0.3</sub>S- B and corresponding EDS mapping.

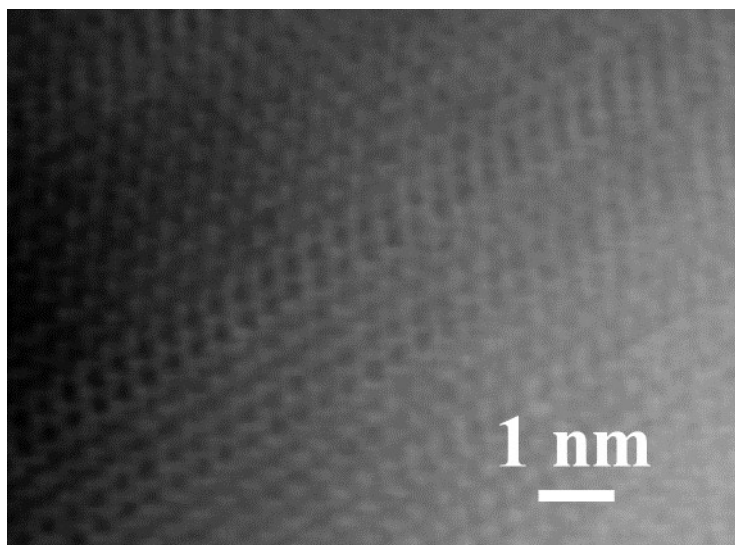

**Fig. S6.** The HAADF-STEM image of  $\text{Cd}_{0.7}\text{Zn}_{0.3}\text{S-B}$ .

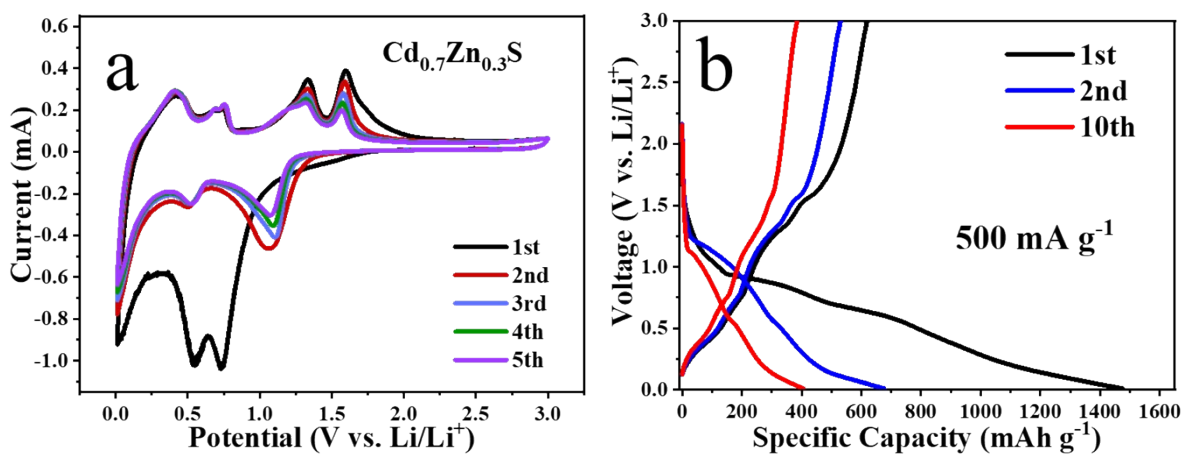

**Fig. S7.** (a) CV curves of the initial five cycles at  $0.2 \text{ mV s}^{-1}$  and (b) discharge-charge curves of different cycles at  $200 \text{ mA g}^{-1}$  for  $\text{Cd}_{0.7}\text{Zn}_{0.3}\text{S}$ .

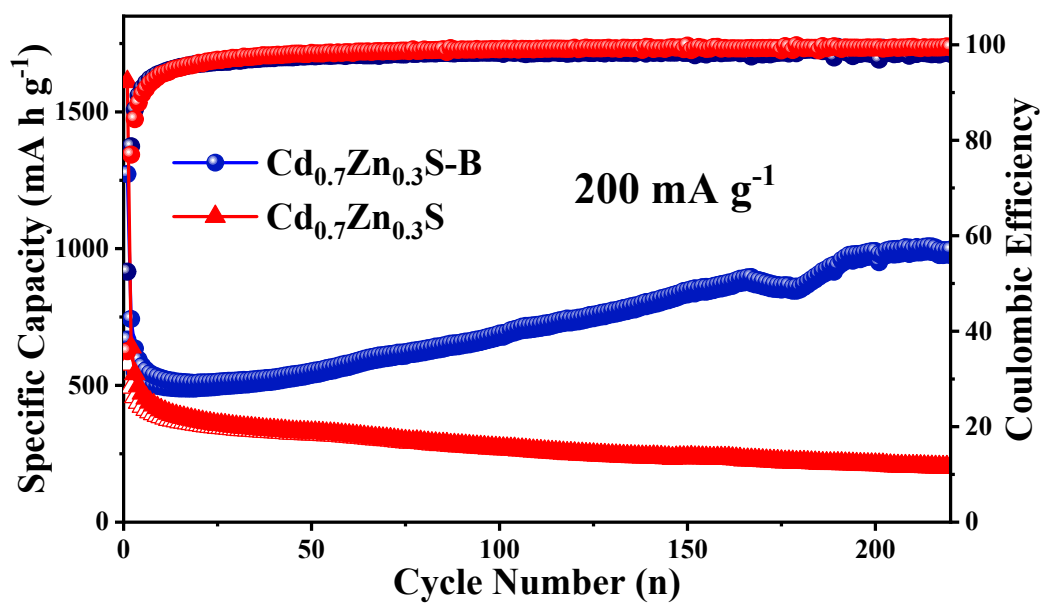

**Fig. S8.** Cycling performance at  $200 \text{ mA g}^{-1}$  for  $\text{Cd}_{0.7}\text{Zn}_{0.3}\text{S}$  and  $\text{Cd}_{0.7}\text{Zn}_{0.3}\text{S-B}$ .

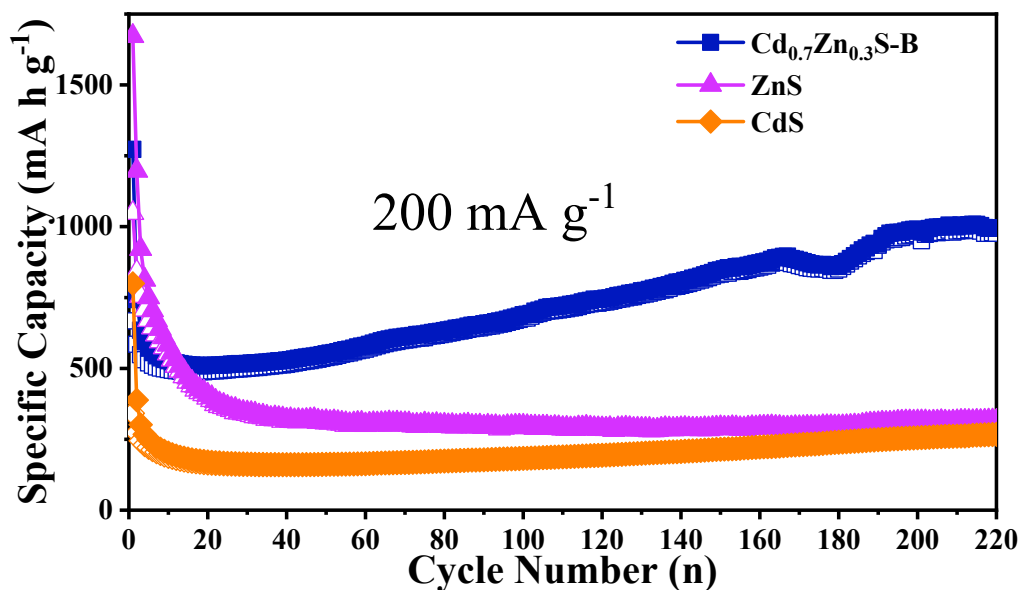

Fig. S9. Cycling performance at  $200 \text{ mA g}^{-1}$  for  $\text{Cd}_{0.7}\text{Zn}_{0.3}\text{S-B}$ , ZnS and CdS.

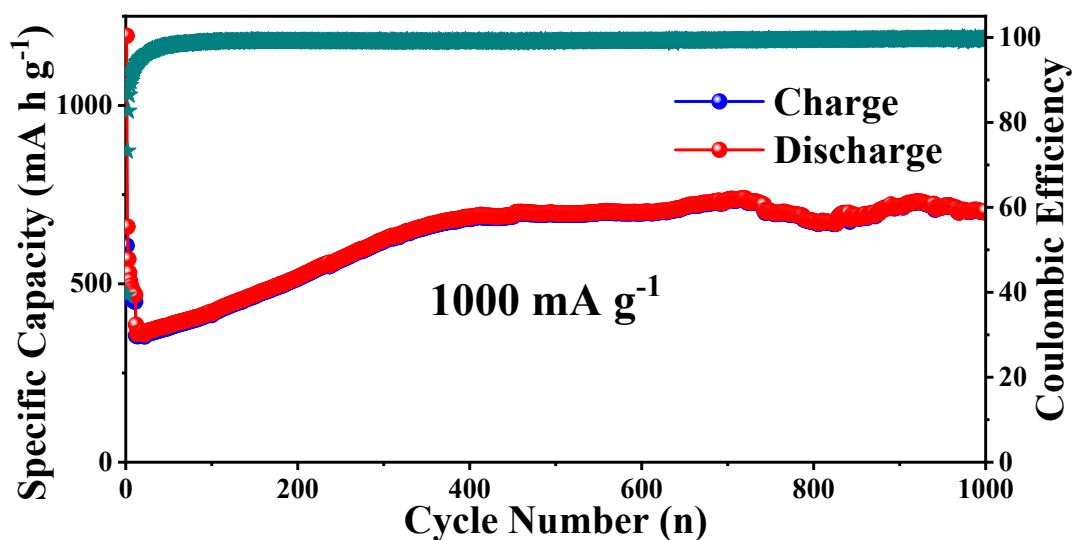

Fig. S10. Long-term cycling performance of  $\text{Cd}_{0.7}\text{Zn}_{0.3}\text{S-B}$  at a current rate of  $1.0 \text{ A g}^{-1}$ .

The reasons for the specific capacity of  $\text{Cd}_{0.7}\text{Zn}_{0.3}\text{S-B}$  continue to ascend with the increase of cycle number as follows. In the initial activation process, the gradual penetration of electrolyte increases the contact with active materials. In addition, the structure of the electrode material will change during the activation cycling process, exposing more active sites for further lithium storage, resulting in an increase in capacity. This phenomenon has been reported in the published literatures[1-3].

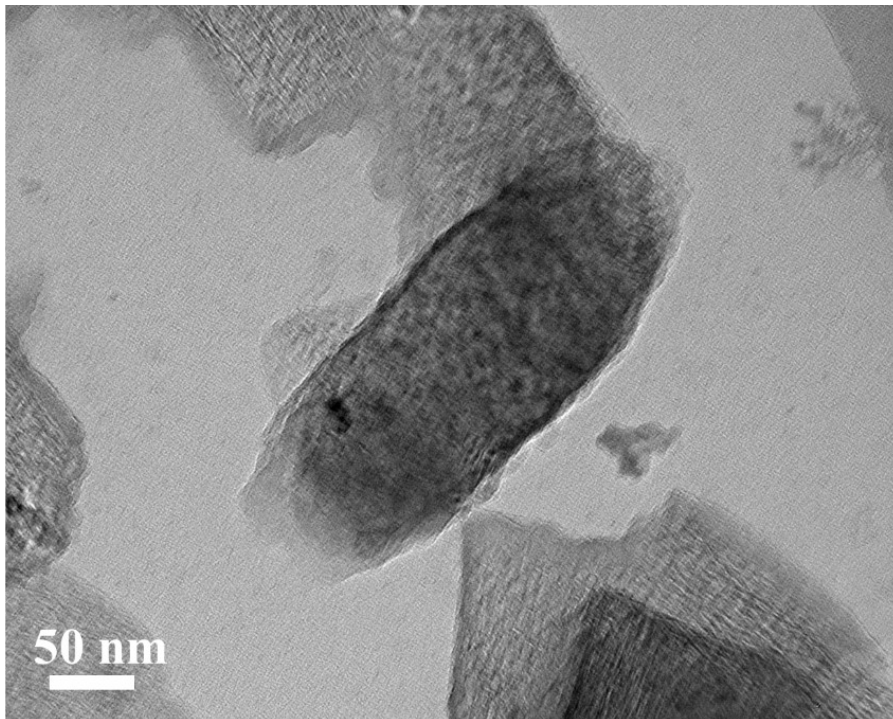

**Fig. S11.** TEM image of the Cd<sub>0.7</sub>Zn<sub>0.3</sub>S-B after 150 cycles.

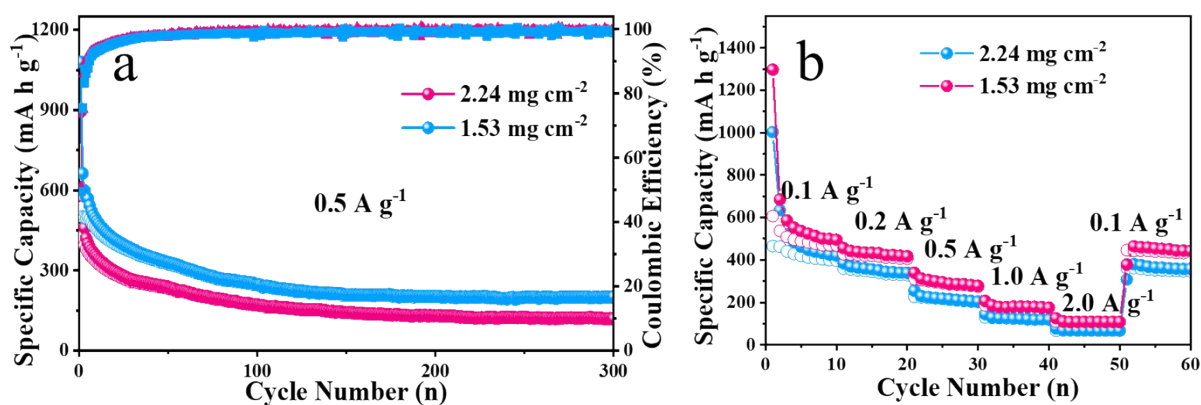

**Fig. S12.** (a) Cycling performance at 0.5 A g<sup>-1</sup> and (b) rate capabilities for Cd<sub>0.7</sub>Zn<sub>0.3</sub>S-B with high areal mass loading of 1.53 and 2.24 mg cm<sup>-2</sup>.

In order to test the practical application potential for Cd<sub>0.7</sub>Zn<sub>0.3</sub>S-B, electrodes with high mass loadings were fabricated. **Fig. S12** shows the electrochemical performance of Cd<sub>0.7</sub>Zn<sub>0.3</sub>S-B with a mass loading of 1.53 and 2.24 mg cm<sup>-2</sup>, respectively. **Fig. S12a** presents that Cd<sub>0.7</sub>Zn<sub>0.3</sub>S-B can charge-discharge 300 cycles stably at 0.5 A g<sup>-1</sup> and maintain a high capacity of 120.7 mA h g<sup>-1</sup> with a mass loading of 1.53 mg cm<sup>-2</sup>. When the mass loading increased to 2.24 mg cm<sup>-2</sup>, its capacity can be kept at 120.7 mA h g<sup>-1</sup>. The rate capabilities of Cd<sub>0.7</sub>Zn<sub>0.3</sub>S-B with different mass loads are shown in **Fig. S12b**, and Cd<sub>0.7</sub>Zn<sub>0.3</sub>S-B with a mass loading of 1.53 mg cm<sup>-2</sup> can deliver an average discharge capacity of 619.0, 432.1, 297.3, 182.2 and 110.5 mA h g<sup>-1</sup> at a current density of 0.1, 0.2, 0.5, 1.0 and 2.0 A g<sup>-1</sup>, respectively. A reversible capacity of 445.0 mA h g<sup>-1</sup> can be maintained when the current density returned to 0.1 A g<sup>-1</sup>. Even with a mass loading of 2.24 mg cm<sup>-2</sup>, an average discharge capacity of 526.9, 355.2, 219.7, 125.2 and 68.4 mA h g<sup>-1</sup> at a current density of 0.1, 0.2, 0.5, 1.0 and 2.0 A g<sup>-1</sup>, respectively. The above data show that Cd<sub>0.7</sub>Zn<sub>0.3</sub>S-B possesses high practical application potential.

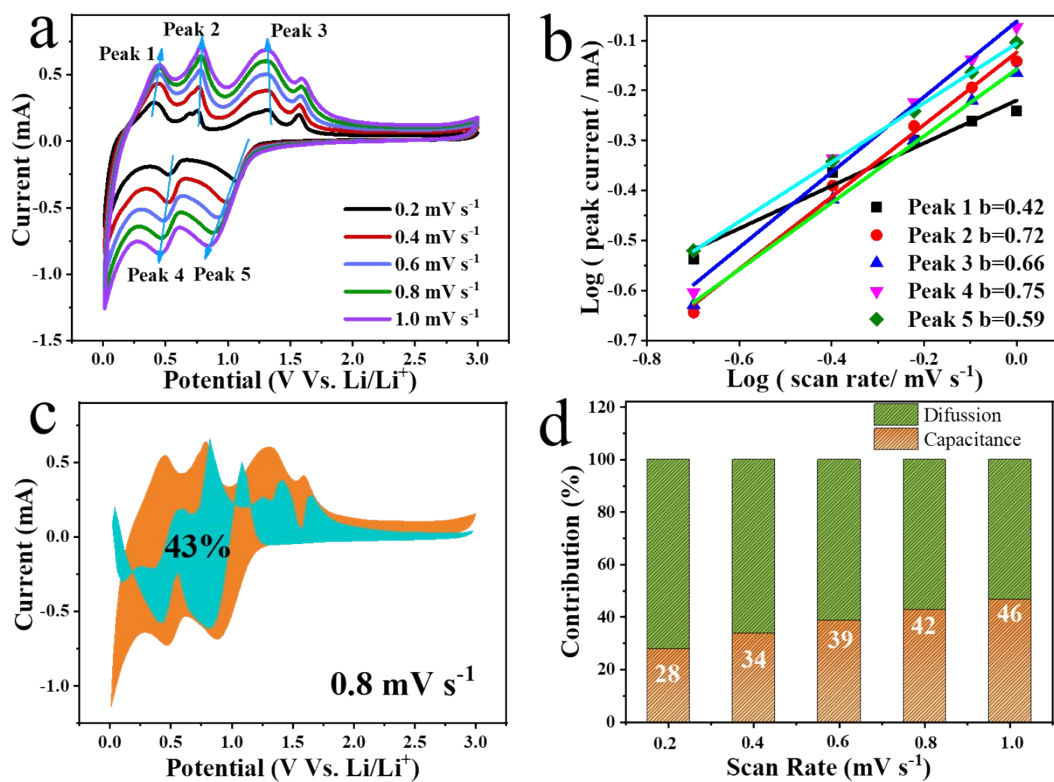

**Fig. S13.** (a) CV curves of  $\text{Cd}_{0.7}\text{Zn}_{0.3}\text{S}$  measured at 0.2-1.0  $\text{mV s}^{-1}$  and (b) the corresponding linear relationship of  $\log(v)$ - $\log(i)$  for lithiation/delithiation peaks. (c) CV profiles of the capacitance contribution ratio at 0.8  $\text{mV s}^{-1}$  for  $\text{Cd}_{0.7}\text{Zn}_{0.3}\text{S}$  and (d) the capacitive contribution at different scan rates for  $\text{Cd}_{0.7}\text{Zn}_{0.3}\text{S}$ .



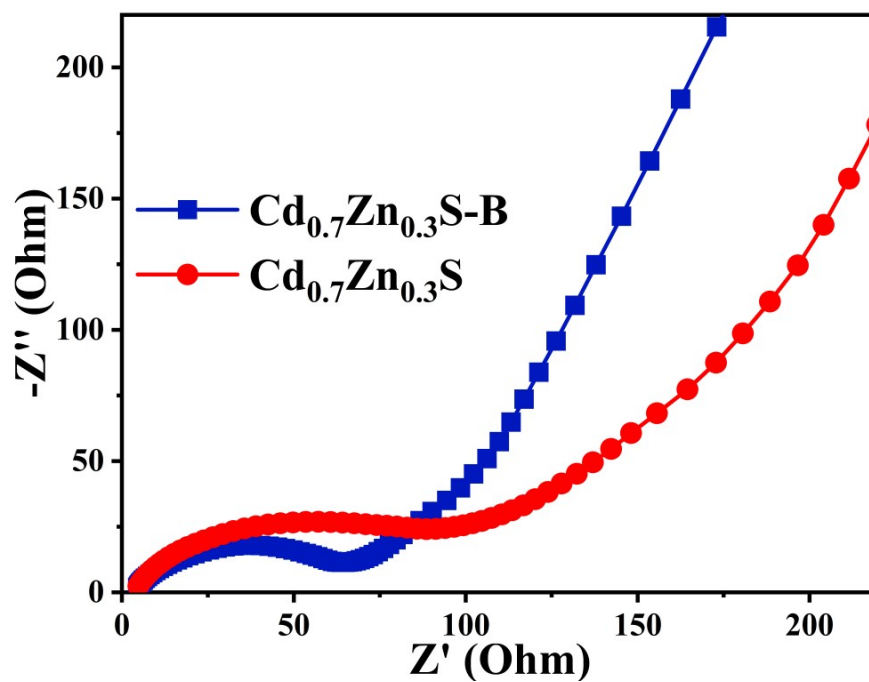

Fig. S14. EIS curves for  $\text{Cd}_{0.7}\text{Zn}_{0.3}\text{S}$  and  $\text{Cd}_{0.7}\text{Zn}_{0.3}\text{S-B}$  after 200 cycles.

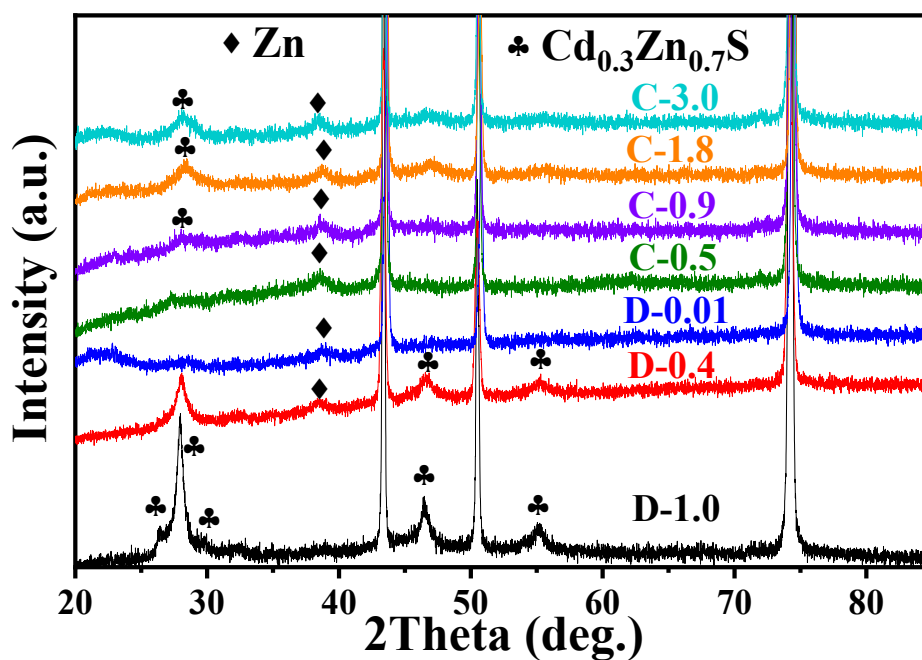

Fig. S15. *Ex-situ* XRD patterns of  $\text{Cd}_{0.3}\text{Zn}_{0.7}\text{S-B}$  electrode under different discharge/charge states.

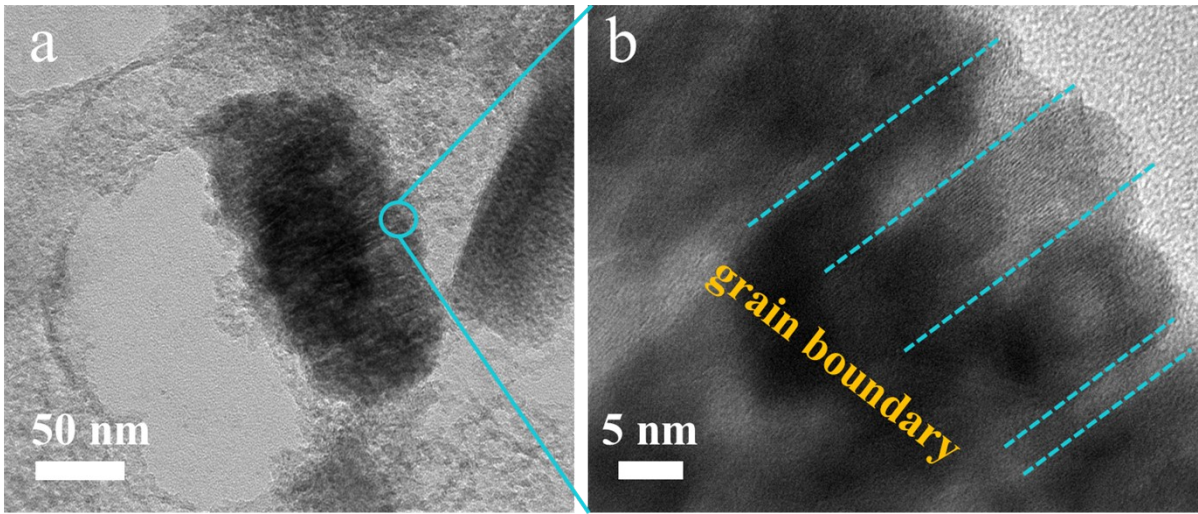

**Fig. S16.** (a) TEM and (b) HRTEM image of the  $\text{Cd}_{0.7}\text{Zn}_{0.3}\text{S-B}$  after charging to 3 V in the first discharging process.

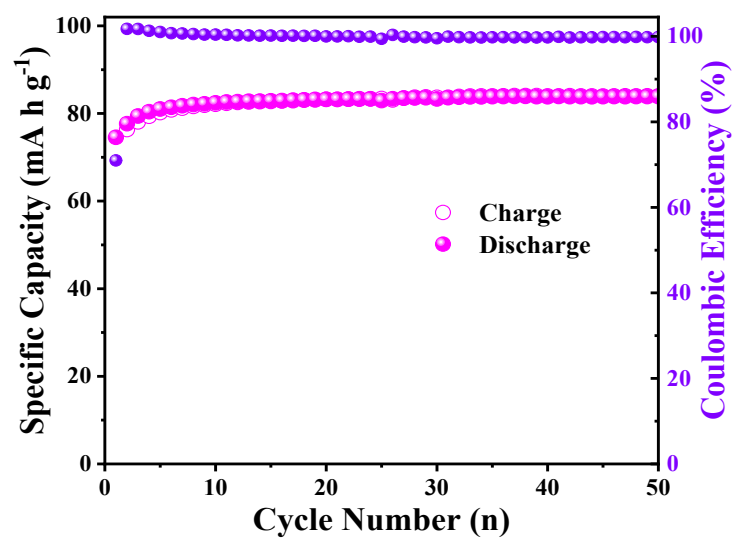

**Fig. S17.** Cycling performance of LiFePO<sub>4</sub> electrode with a mass loading of 2.58 mg cm<sup>-2</sup> at 0.5 A g<sup>-1</sup>.

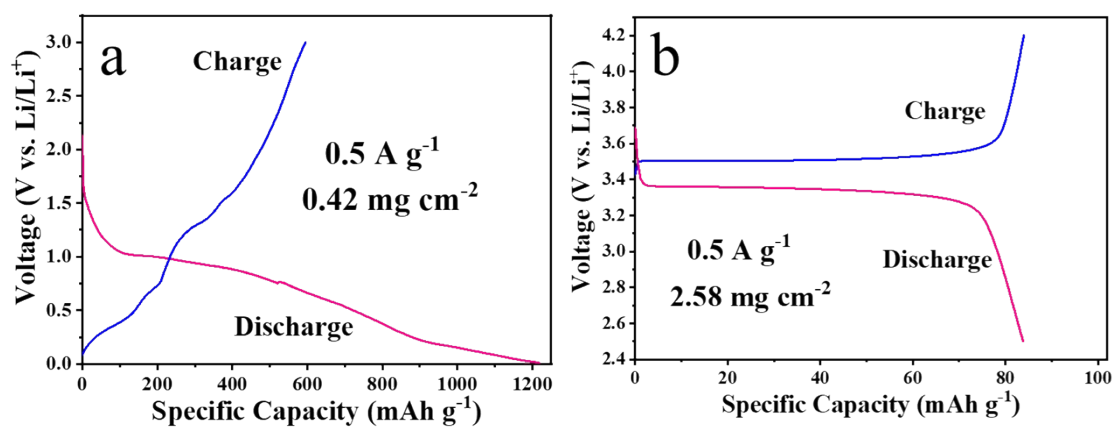

**Fig. S18.** Charge-discharge curves of (a) Cd<sub>0.7</sub>Zn<sub>0.3</sub>S-B anode and (b) LiFePO<sub>4</sub> cathode electrode material at 0.5 A g<sup>-1</sup>.

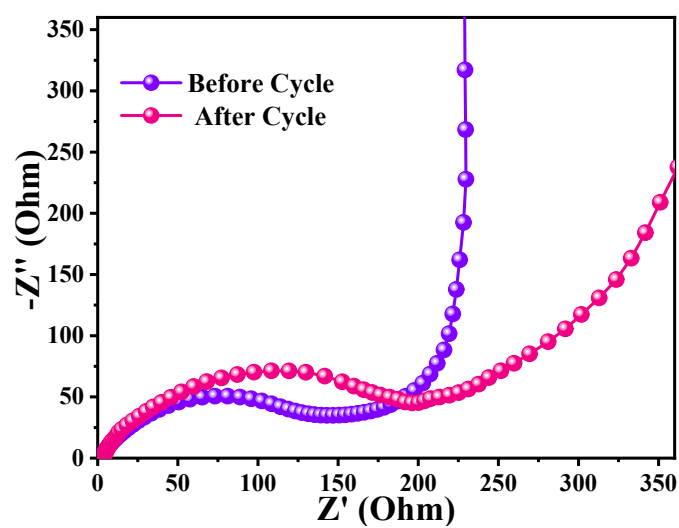

Fig. S19. EIS curves for  $\text{Cd}_{0.7}\text{Zn}_{0.3}\text{S-B}$  before and after cycle.

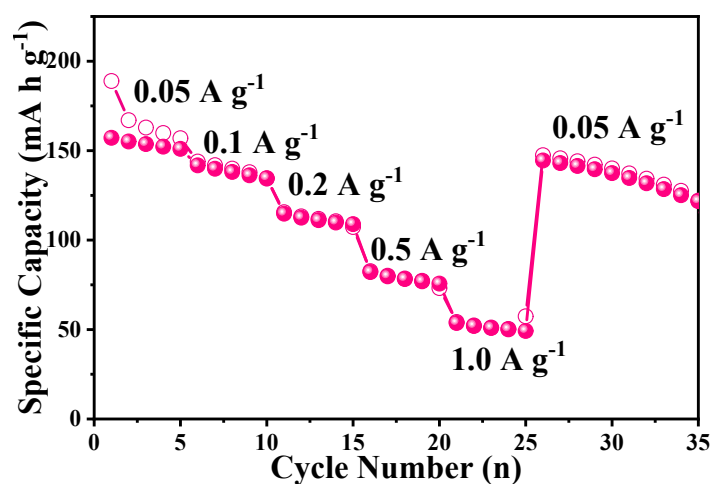

Fig. S20. Rate capabilities of  $\text{Cd}_{0.7}\text{Zn}_{0.3}\text{S-B}||\text{NaNcMT}$  full cell.

## References

- [1] H. Jiang, Y. Gan, J. Liu, X. Wang, R. Ma, J. Liu, and J. Wang, *J. Mater. Chem. A*, 2022, **10**, 9468-9481.
- [2] X. Jin, H. Huang, A. Wu, S. Gao, M. Lei, J. Zhao, X. Gao, and G. Cao, *ACS Nano* 2018, **12**, 8037-8047.
- [3] R. Hu, Y. Ouyang, T. Liang, H. Wang, J. Liu, J. Chen, C. Yang, L. Yang, and M. Zhu, *Adv. Mater.* 2017, **29**, 1605006.
